# Supplementary material for: PERK activation mitigates tau pathology in vitro and in vivo
Source: PubMed Central journal article supplement (PMC5331260; doi:10.15252/emmm.201606664), 2017-02-01
Supplement: EMMM-9-371-s001.pdf [file EMMM-9-371-s001.pdf]

# **PERK activation mitigates tau pathology *in vitro* and *in vivo***

Julius Bruch<sup>1,2,3,#</sup>, Hong Xu<sup>1,2,3,#</sup>, Thomas W. Rösler<sup>1,2,#</sup>, Anderson De Andrade<sup>1,3</sup>, Peer-Hendrik Kuhn<sup>4,5</sup>, Stefan F. Lichtenthaler<sup>3,4,6</sup>, Thomas Arzberger<sup>7</sup>, Konstanze F. Winklhofer<sup>3,8</sup>, Ulrich Müller<sup>9</sup>, Günter U. Höglinger<sup>1,2,3,\*</sup>

#These authors contributed equally to the work.

\*Corresponding author

## **Appendix Table of Contents:**

### **Appendix Figures**

**Appendix Figure S1.** Lentiviral overexpression of tau isoforms *in vitro*.

**Appendix Figure S2.** PERK activation prevents annonacin-induced neurofilament dephosphorylation.

**Appendix Figure S3.** PERK activation *in vivo*.

**Appendix Figure S4.** Silencing efficacy of *NFE2L2* siRNA.

**Appendix Table S1.** Details of substances used for treatment

**Appendix Table S2.** Overview of plasmids used for cloning

**Appendix Table S3.** Primers and restriction enzymes used for cloning of vector plasmids

**Appendix Table S4.** Overview of human tissue samples used

**Appendix Table S5.** Overview of antibodies used

**Appendix Table S6.** *P*-values of figures

### **References**

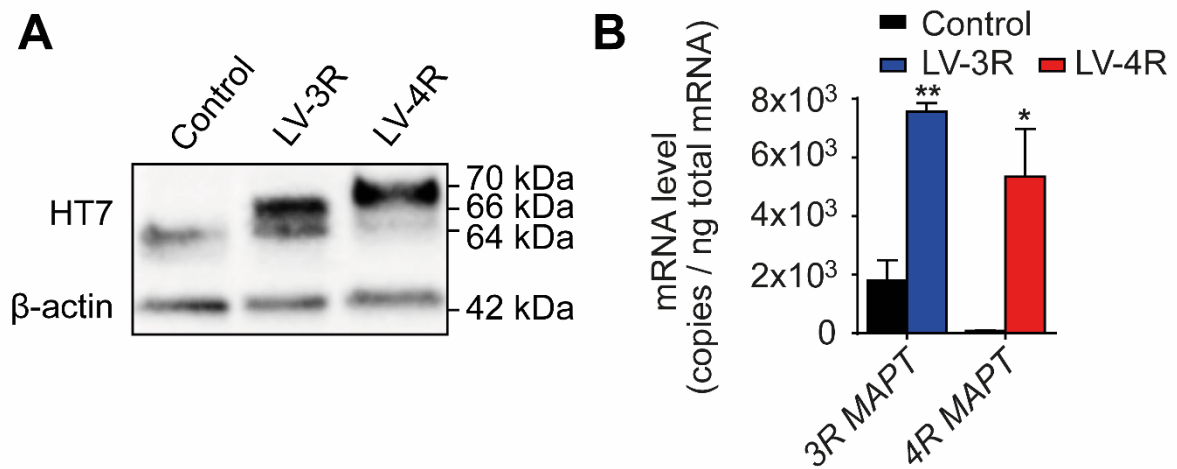

**Appendix Figure S1. Lentiviral overexpression of tau isoforms *in vitro*.**

- A Western blot of total tau protein (HT7 antibody) showing the overexpression of different isoforms in LUHMES neurons after 8 days of differentiation compared to untreated (control) neurons or neurons incubated with lentiviruses encoding 3R (LV-3R) or 4R (LV-4R) tau. The predominant endogenous isoform at this stage of differentiation is the 3R subisoform of approximately 64 kDa. The 3R2N isoform overexpressed by LV-3R runs at 66 kDa, and the molecular weight of the 4R2N isoform overexpressed by LV4R is about 70 kDa. Actin was used as loading control.
- B RT-qPCR of 4R and 3R tau mRNAs in 8 days old LUHMES neurons, treated as in (A) ( $n = 3$  per condition). Data are mean + SEM. Statistical analysis was Student's *t*-test; \* $P < 0.05$ , \*\* $P < 0.01$  vs. control.

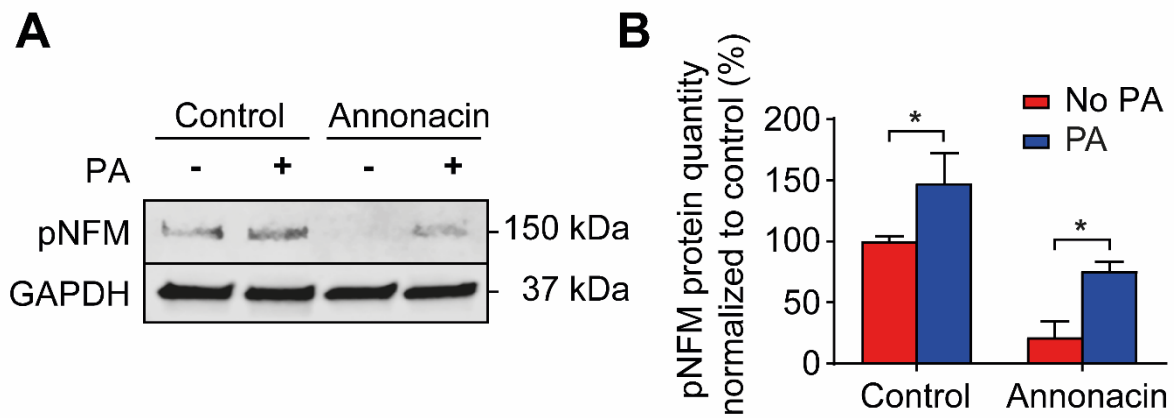

**Appendix Figure S2. PERK activation prevents annonacin-induced neurofilament dephosphorylation.**

- A Representative Western blot of LUHMES neurons treated with or without annonacin (25 nM) and with or without the PERK activator (PA, 200 nM). The antibodies depicted phosphorylated neurofilament-medium polypeptide (pNFM) and GAPDH as loading control.
- B Densitometric analysis of Western blots described in (A) ( $n = 3$ ), normalized to the loading control and to untreated control cells. Data are mean + SEM. Statistical analysis was ANOVA followed by Newman-Keuls multiple comparison test. \* $P < 0.05$ .

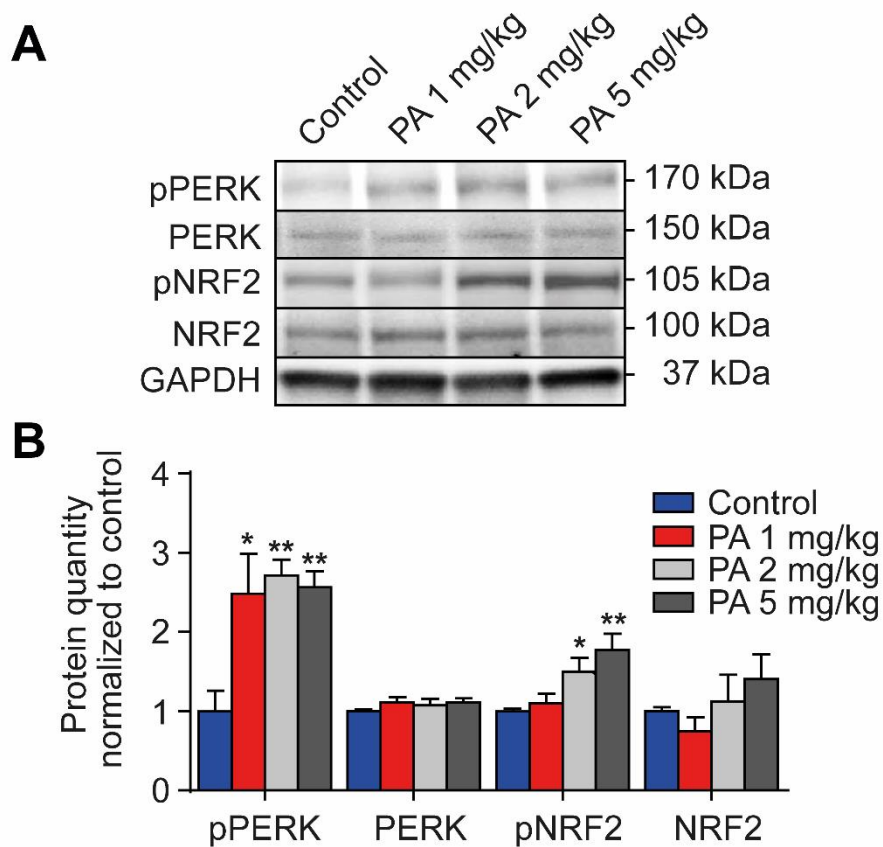

**Appendix Figure S3. PERK activation *in vivo*.**

- A** 15-week-old wildtype mice were injected i.p. with different doses of PERK activator (PA; 1, 2 or 5 mg/kg) once daily for 3 days. Untreated mice were used as controls. Representative Western blots of whole brain homogenates immunostained with antibodies against phosphorylated PERK (pPERK), total PERK, phosphorylated NRF2 (pNRF2) and total NRF2. GAPDH was used as loading control.
- B** Densitometric analysis of Western blot (A), normalized to untreated controls ( $n = 3$ ). Data are mean + SEM. Statistical analysis was one-way ANOVA with post-hoc Fisher's LSD test. \* $P < 0.05$ , \*\* $P < 0.01$  vs. control.

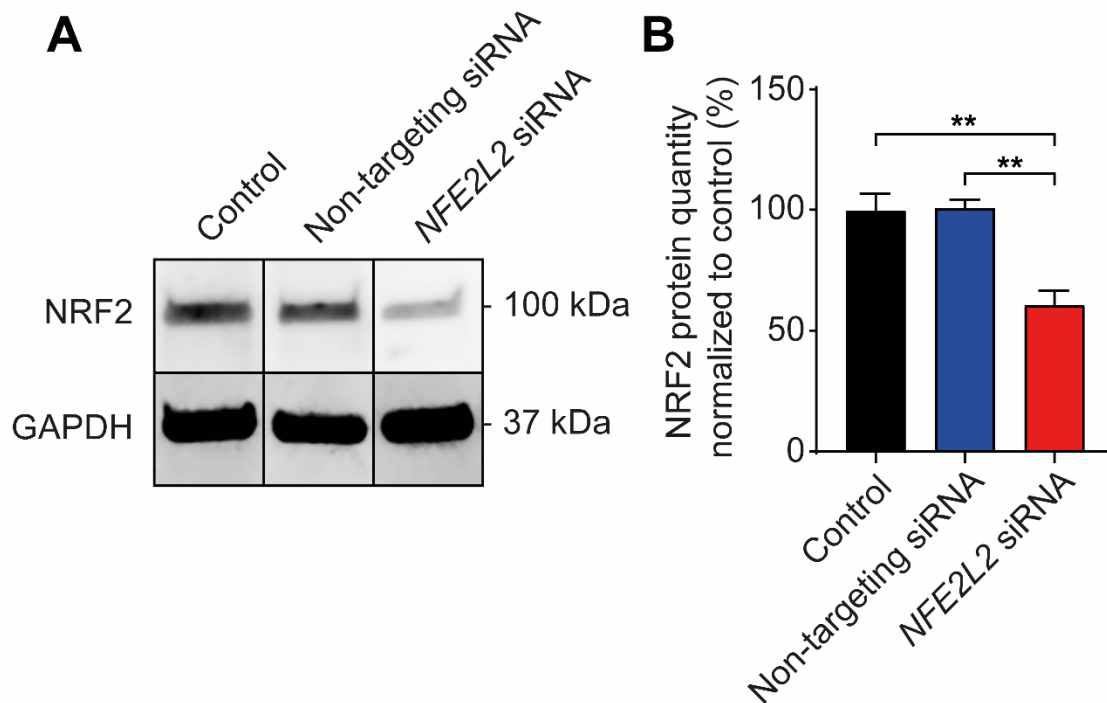

**Appendix Figure S4. Silencing efficacy of *NFE2L2* siRNA.**

- A Representative Western blots of LUHMES neurons untreated or treated with 50 nM non-targeting siRNA or *NFE2L2* siRNA. The antibodies depicted nuclear factor (erythroid-derived 2)-like 2 (NRF2) and GAPDH as loading control.
- B Densitometric analysis of Western blots described in (A) ( $n = 3$ ), normalized to the loading control and to untreated control cells. Data are mean + SEM. Statistical analysis was one-way ANOVA followed by Tukey's post-hoc test.  $**P < 0.01$ .

## Appendix Table S1

Details of substances used for treatment

| Substance name                                     | Source                                                                                    | Dissolving and dilution                                            | Treatment concentration* | Treatment duration*                     |
|----------------------------------------------------|-------------------------------------------------------------------------------------------|--------------------------------------------------------------------|--------------------------|-----------------------------------------|
| Annonacin                                          | Extracted from <i>Annona muricata</i> L. fruits by Pierre Champy, Univ. Paris-Sud, France | Dissolved in DMSO (AppliChem) to 1 mM, diluted further with medium | 25 nM                    | 48 h (days 8 – 10 post differentiation) |
| PERK activator (CCT020312) (Stockwell et al, 2012) | Merck Millipore, Billerica, MA, USA                                                       | Dissolved in DMSO to 10 mM, diluted further with medium            | 200 nM                   | 48 h (days 8 – 10 post differentiation) |
| PERK inhibitor (GSK2606414)                        | Toronto Research Chemicals, North York, ON, Canada                                        | Dissolved in DMSO to 10 mM, diluted further with medium            | 300 nM                   | 48 h (days 8 – 10 post differentiation) |
| Thapsigargin                                       | AppliChem, Darmstadt, Germany                                                             | Dissolved in DMSO to 10 mM, diluted further with medium            | 30 nM                    | 48 h (days 8 – 10 post differentiation) |
| DL-sulforaphane-N-acetyl-L-cysteine                | Cayman Chemical (16098)                                                                   | Dissolved in DMSO to 100 mM, diluted further with medium           | 100 nM                   | 48 h (days 8 – 10 post differentiation) |
| Stealth NFE2L2 siRNA                               | 5843822, Thermo Fisher Scientific                                                         | RNAse free water (Thermo Fisher Scientific)                        | 50 nM                    | post differentiation day 4              |
| Stealth non-targeting siRNA (medium GC duplex #2)  | 465372, Thermo Fisher Scientific                                                          | RNAse free water (Thermo Fisher Scientific)                        | 50 nM                    | post differentiation day 4              |

\*unless indicated otherwise

## Appendix Table S2

Overview of plasmids used for cloning

| Gene Insert | Species           | Full plasmid name       | Source                                                                                                     | Reference            |
|-------------|-------------------|-------------------------|------------------------------------------------------------------------------------------------------------|----------------------|
| MAPT 2N3R   | Human             | pRK172/htau39           | Eva-Maria Mandelkow, DZNE Bonn, Germany                                                                    |                      |
| MAPT 2N4R   | Human             | pNG2 htau40             | Eva-Maria Mandelkow, DZNE Bonn, Germany                                                                    |                      |
| Eif2ak3     | Mouse             | PERK.WT.9E10.pCD NA.amp | David Ron, University of Cambridge, UK (via Konstanze Winklhofer, Ruhr Universität Bochum Bochum, Germany) | (Bouman et al, 2011) |
| n.a.        | n.a.              | FU-ΔZeo                 | Stefan Lichtenthaler, DZNE Munich, Germany                                                                 | (Kuhn et al, 2010)   |
| mCherry     | Aequorea victoria | mCherry/FU- ΔZeo        | Stefan Lichtenthaler, DZNE Munich, Germany                                                                 |                      |

### Appendix Table S3

Primers and restriction enzymes used for cloning of vector plasmids

| Original plasmid           | Forward primer                         | Reverse primer                        | Restriction enzymes          |
|----------------------------|----------------------------------------|---------------------------------------|------------------------------|
| pRK172/htau39              | GATCTCTAGAATCACAAA<br>CCCTGCTTGGCCAG   | GATCGGATCCGATATACATA<br>TGGCTGAGCC    | BamH1-HF, Xba1               |
| pNG2 htau40                | GATCTCTAGAATCACAAA<br>CCCTGCTTGGCCAG   | GATCGGATCCGGAGATATAC<br>ATATGGCTGAGCC | BamH1-HF, Xba1               |
| PERK.WT.9E10.<br>pCDNA.amp | caggtcgactctagagGCGATGTC<br>TGCACAAGGC | cgataagcttgatcGCCAGGCAG<br>TGGCGTGTA  | Gibson Assembly<br>Mastermix |



## Appendix Table S4

Overview of human tissue samples used

| Case number | Diagnosis | Age at death | Sex    | Postmortem time (h) |
|-------------|-----------|--------------|--------|---------------------|
| C1          | Control   | 78           | Female | 8                   |
| C2          | Control   | 77           | Female | 10                  |
| C3          | Control   | 77           | Female | 20                  |
| C4          | Control   | 73           | Female | 17                  |
| C5          | Control   | 66           | Female | 27                  |
| C6          | Control   | 74           | Male   | 33                  |
| P1          | PSP       | 62           | Female | 9                   |
| P2          | PSP       | 76           | Male   | 12                  |
| P3          | PSP       | 76           | Female | 10                  |
| P4          | PSP       | 75           | Male   | 12                  |
| P5          | PSP       | 67           | Male   | 40                  |
| P6          | PSP       | 69           | Male   | 12                  |
| P7          | PSP       | 78           | Female | 30                  |

## Appendix Table S5

Overview of antibodies used

| Antigen                         | Clone      | Species | Concentration             | Source                                            |
|---------------------------------|------------|---------|---------------------------|---------------------------------------------------|
| PERK                            | D11A8      | Rabbit  | 1:1000 (WB)<br>1:100 (IP) | Cell Signaling Technology                         |
| pT980-PERK                      | 16F8       | Rabbit  | 1:1000                    | Cell Signaling Technology                         |
| p-Ser-396 PHF Tau               | AD2        | Mouse   | 1:2000                    | BioRad                                            |
| 4 repeat Tau                    | 1E1/A6     | Mouse   | 1:333                     | Merck Millipore                                   |
| 3 repeat Tau                    | 8E6/C11    | Mouse   | 1:1000                    | Merck Millipore                                   |
| p-Ser-202 Tau                   | CP13       | Mouse   | 1:500                     | Peter Davies, Albert Einstein College,<br>NY, USA |
| Conformationally<br>changed Tau | MC1        | Mouse   | 1:333                     | Peter Davies, Albert Einstein College,<br>NY, USA |
| Total human tau                 | HT7        | Mouse   | 1:1000                    | Thermo Fisher Scientific                          |
| EIF2A                           | polyclonal | Rabbit  | 1:1000                    | Cell Signaling Technology                         |
| pS51-EIF2A                      | D9G8       | Rabbit  | 1:1000                    | Cell Signaling Technology                         |
| NRF2                            | ab62352    | Rabbit  | 1 : 1 000                 | Abcam                                             |
| pS40-NRF2                       | EP1809Y    | Rabbit  | 1: 1000                   | GeneTex (Irvine, CA, USA)                         |
| pNFM                            | RMO55      | Mouse   | 1: 1000                   | Millipore                                         |
| HO-1                            | HO-1-1     | Mouse   | 1: 250                    | Abcam                                             |

## Appendix Table S6

*P*-values of figures

| Figure           |             | Comparison            | Significance symbol | <i>P</i> -Value |         |
|------------------|-------------|-----------------------|---------------------|-----------------|---------|
| <b>Figure 1B</b> | pPERK       | Control vs. PSP       | *                   | 0.0355          |         |
|                  | PERK        | Control vs. PSP       | *                   | 0.0280          |         |
|                  | pEIF2A      | Control vs. PSP       | *                   | 0.0353          |         |
|                  | EIF2A       | Control vs. PSP       | **                  | 0.0018          |         |
|                  | pNRF2       | Control vs. PSP       | **                  | 0.0096          |         |
|                  | NRF2        | Control vs. PSP       | ***                 | 0.0001          |         |
| <b>Figure 1D</b> | pPERK       | Control vs. THG       | ***                 | 0.0001          |         |
|                  |             | Control vs. ANN       | ***                 | 0.0005          |         |
|                  | PERK        | Control vs. THG       | *                   | 0.0100          |         |
|                  |             | Control vs. ANN       | **                  | 0.0031          |         |
|                  | pEIF2A      | Control vs. THG       | ***                 | 0.0001          |         |
|                  |             | Control vs. LV-4R     | **                  | 0.0085          |         |
|                  | EIF2A       | Control vs. THG       | **                  | 0.0099          |         |
|                  |             | Control vs. ANN       | **                  | 0.0043          |         |
| <b>Figure 2A</b> |             | Control vs. LV-4R     | *                   | 0.0318          |         |
|                  |             | ANN 12.5 nM           | PA vs. Control      | *               | 0.0155  |
|                  |             | ANN 25 nM             | PA vs. Control      | *               | 0.0262  |
|                  |             | ANN 50 nM             | PA vs. Control      | ***             | <0.0001 |
|                  |             | ANN 100 nM            | PA vs. Control      | *               | 0.0200  |
| <b>Figure 2B</b> |             | ANN 12.5 nM           | PA vs. Control      | **              | 0.0013  |
|                  |             | ANN 12.5 nM           | PI vs. Control      | ++              | 0.0013  |
|                  |             | ANN 25 nM             | PA vs. Control      | **              | 0.0062  |
|                  |             | ANN 50 nM             | PA vs. Control      | ***             | <0.0001 |
| <b>Figure 2C</b> | MTT         | LV-mCh vs. LV-4R      | ###                 | 0.0004          |         |
|                  |             | LV-4R vs. LV-4R + PA  | ###                 | 0.0007          |         |
| <b>Figure 2D</b> | ATP         | LV-mCh vs. LV-4R      | ###                 | <0.0001         |         |
|                  |             | LV-mCh vs. LV-4R + PA | ###                 | <0.0001         |         |
|                  |             | LV-4R vs. LV-4R + PA  | ###                 | <0.0001         |         |
|                  |             | LV-4R vs. LV-4R + PI  | ###                 | <0.0001         |         |
| <b>Figure 2G</b> | Cell number | Control vs. LV-4R     | ##                  | 0.0093          |         |
|                  |             | Control vs. ANN       | #                   | 0.0427          |         |
|                  |             | LV-4R vs. LV-4R + PA  | #                   | 0.0355          |         |
|                  |             | ANN vs. ANN + PA      | ##                  | 0.0014          |         |
|                  |             | ANN + PA vs. ANN + PI | ##                  | 0.0048          |         |
| <b>Figure 3B</b> | MC1         | Control vs. ANN       | *                   | 0.0280          |         |
|                  |             | ANN vs. ANN + PA      | ##                  | 0.0014          |         |
|                  | CP13        | ANN vs. Control       | *                   | 0.0289          |         |
|                  |             | ANN vs. ANN + PA      | #                   | 0.0355          |         |
|                  | AD2         | ANN vs. Control       | *                   | 0.0191          |         |
|                  |             | ANN vs. ANN + PA      | #                   | 0.0139          |         |
| <b>Figure 3D</b> | 4R tau      | Control vs. ANN       | ***                 | <0.0001         |         |
|                  |             | Control vs. ANN + PA  | **                  | 0.0026          |         |
|                  |             | ANN vs. ANN + PA      | ###                 | <0.0001         |         |
| <b>Figure 3E</b> | 4R MAPT     | Control vs. ANN       | ***                 | <0.0001         |         |
|                  |             | ANN vs. ANN + PA      | ###                 | <0.0001         |         |
| <b>Figure 3F</b> | SRSF2       | Control vs. ANN       | ***                 | <0.0001         |         |
|                  |             | ANN vs. ANN + PA      | #                   | 0.0131          |         |
| <b>Figure 3H</b> | CP13        | Control vs. LV-4R     | ***                 | 0.0009          |         |
|                  |             | LV-4R vs. LV-4R + PA  | ##                  | 0.0057          |         |
|                  | AD2         | Control vs. LV-4R     | *                   | 0.0113          |         |

| Figure             |                          | Comparison                | Significance symbol | P-Value              |
|--------------------|--------------------------|---------------------------|---------------------|----------------------|
|                    |                          | Control vs. LV-4R + PA    | *                   | 0.0236               |
|                    | HT7                      | Control vs. LV-4R         | *                   | 0.0136               |
|                    |                          | Control vs. LV-4R + PA    | *                   | 0.0152               |
| <b>Figure 4B</b>   |                          | pPERK                     | WT + PA vs. WT + NS | *                    |
|                    | pNRF2                    | WT + PA vs. WT + NS       | *                   | 0.0493               |
| <b>Figure 4D</b>   | MC1                      | P301S + PA vs. P301S + NS | *                   | 0.0471               |
|                    | CP13                     | P301S + PA vs. P301S + NS | *                   | 0.0405               |
|                    | AT180                    | P301S + PA vs. P301S + NS | *                   | 0.0404               |
|                    | HT7                      | P301S + PA vs. P301S + NS | *                   | 0.0205               |
| <b>Figure 4F</b>   | HT7                      | P301S + PA vs. P301S + NS | *                   | 0.0250               |
|                    | MC1                      | P301S + PA vs. P301S + NS | *                   | 0.0430               |
|                    | CP13                     | P301S + PA vs. P301S + NS | *                   | 0.0265               |
|                    | AT180                    | P301S + PA vs. P301S + NS | *                   | 0.0269               |
| <b>Figure 5A</b>   | Latency to find platform | WT + NS vs. P301S + NS    | *                   | 0.0412               |
|                    |                          | P301S + NS vs. P301S + PA | #                   | 0.0287               |
| <b>Figure 5C</b>   | Spine density            | WT + NS vs. P301S + PA    | #                   | 0.0293               |
|                    |                          | WT + NS vs. P301S + NS    | ***                 | 0.0002               |
|                    |                          | P301S + NS vs. P301S + PA | ##                  | 0.0073               |
| <b>Figure 5D</b>   | Latency to fall          | WT + NS vs. P301S + PA    | #                   | 0.0475               |
|                    |                          | WT + NS vs. P301S + NS    | ***                 | <0.0001              |
|                    |                          | P301S + NS vs. P301S + PA | ###                 | <0.0001              |
| <b>Figure 5E</b>   | Motoneuron number        | WT + NS vs. P301S + NS    | *                   | 0.0282               |
|                    |                          | P301S + NS vs. P301S + PA | #                   | 0.0319               |
| <b>Figure EV1B</b> | pPERK                    | P301S 2m vs. WT 6m        | *                   | <0.05 <sup>a</sup>   |
|                    |                          | P301S 6m vs. WT 6m        | *                   | <0.05 <sup>a</sup>   |
|                    |                          | P301S 2m vs. P301S 6m     | **                  | <0.01 <sup>a</sup>   |
|                    | PERK                     | P301S 6m vs. WT 6m        | *                   | <0.05 <sup>a</sup>   |
|                    |                          | P301S 2m vs. P301S 6m     | *                   | <0.05 <sup>a</sup>   |
|                    | pEIF2A                   | P301S 2m vs. WT 6m        | *                   | <0.05 <sup>a</sup>   |
|                    |                          | P301S 6m vs. WT 6m        | *                   | <0.05 <sup>a</sup>   |
|                    | pNRF2                    | P301S 6m vs. WT 6m        | ***                 | <0.0001 <sup>a</sup> |
|                    |                          | P301S 2m vs. P301S 6m     | ***                 | <0.0001 <sup>a</sup> |
| <b>Figure EV2A</b> | MTT                      | PA 10 $\mu$ M vs. Control | *                   | 0.0264               |
| <b>Figure EV2E</b> | pEIF2A                   | PA vs. Control            | *                   | 0.0486               |
|                    |                          | PI vs. Control            | *                   | 0.0452               |
|                    | pNRF2                    | PA vs. Control            | *                   | 0.0378               |
|                    |                          | PI vs. Control            | *                   | 0.0387               |
|                    |                          | ANN vs. Control           | *                   | 0.0297               |
|                    |                          | ANN + PA vs. Control      | *                   | 0.0135               |
|                    |                          | ANN + PI vs. Control      | *                   | 0.0375               |
|                    |                          | ANN vs. ANN + PA          | ##                  | 0.0025               |
| <b>Figure EV2G</b> |                          | pEIF2A                    | LV-4R vs. Control   | *                    |
|                    | LV4R + PA vs. Control    |                           | *                   | 0.0421               |
|                    | LV-4R + PI vs. Control   |                           | **                  | 0.0099               |
|                    | LV-3R vs. Control        |                           | *                   | 0.0164               |
|                    | LV-3R + PA vs. Control   |                           | *                   | 0.0200               |
|                    | LV-3R + PI vs. Control   |                           | *                   | 0.0348               |
|                    | LV-4R vs. LV-4R + PI     |                           | ##                  | 0.0073               |
|                    | pNRF2                    | LV-4R vs. LV-4R + PA      | #                   | 0.0493               |
| <b>Figure EV3</b>  | Neuritic network density | LV-4R vs. Control         | ***                 | <0.0001              |
|                    |                          | LV-4R vs. LV-4R + PA      | ***                 | <0.0001              |
|                    |                          | LV-4R vs. LV-4R + PI      | ***                 | 0.0002               |
|                    |                          | ANN vs. Control           | ***                 | <0.0001              |
|                    |                          | ANN vs. ANN + PA          | **                  | 0.0015               |
|                    |                          | ANN vs. ANN + PI          | ***                 | <0.0001              |
|                    |                          | ANN + PA vs. ANN + PI     | ***                 | <0.0001              |
|                    |                          |                           |                     |                      |

| Figure                  |                | Comparison                                  | Significance symbol | P-Value            |
|-------------------------|----------------|---------------------------------------------|---------------------|--------------------|
| <b>Figure EV4B</b>      | HO-1           | PA vs. Control                              | *                   | 0.0237             |
| <b>Figure EV4C</b>      | LV-4R          | No SFN-NAC vs. SFN-NAC                      | *                   | 0.0458             |
| <b>Figure EV4D</b>      | LV-4R          | <i>NFE2L2</i> siRNA vs. No siRNA            | ***                 | <0.0001            |
|                         |                | <i>NFE2L2</i> siRNA vs. Non-targeting siRNA | ***                 | 0.0002             |
| <b>Figure EV5B</b>      | <i>4R MAPT</i> | ANN vs. Control                             | ***                 | 0.0004             |
|                         |                | ANN vs. ANN + LV-PERK                       | ##                  | 0.0027             |
| <b>Figure EV5C</b>      | MTT            | ANN vs. Control                             | ***                 | <0.0001            |
|                         |                | ANN vs. ANN + LV-PERK                       | ###                 | <0.0001            |
|                         |                | LV-PERK vs. Control                         | ***                 | <0.0001            |
| <b>Figure EV5D</b>      | ATP            | ANN vs. Control                             | ***                 | <0.0001            |
|                         |                | ANN vs. ANN + LV-PERK                       | ###                 | <0.0001            |
|                         |                | LV-PERK vs. Control                         | ***                 | <0.0001            |
| <b>Figure EV5E</b>      | MTT            | LV-mCh vs. Control                          | ***                 | <0.0001            |
|                         |                | LV-mCh vs. LV-4R                            | ###                 | <0.0001            |
|                         |                | LV-4R vs. LV-4R +LV-PERK                    | #                   | 0.0100             |
| <b>Figure EV5F</b>      | ATP            | LV-mCh vs. Control                          | ***                 | <0.0001            |
|                         |                | LV-mCh vs. LV-4R                            | ###                 | <0.0001            |
|                         |                | LV-4R vs. LV-4R +LV-PERK                    | ###                 | <0.0001            |
| <b>Appendix Fig S1B</b> | <i>3R MAPT</i> | LV-3R vs. Control                           | **                  | 0.0016             |
|                         | <i>4R MAPT</i> | LV-4R vs. Control                           | *                   | 0.0323             |
| <b>Appendix Fig S2B</b> | Control        | PA vs. No PA                                | *                   | <0.05 <sup>a</sup> |
|                         | Annonacin      | PA vs. No PA                                | *                   | <0.05 <sup>a</sup> |
| <b>Appendix Fig S3B</b> | pPERK          | PA 1 mg/kg vs. Control                      | *                   | 0.0107             |
|                         |                | PA 2 mg/kg vs. Control                      | **                  | 0.0051             |
|                         |                | PA 5 mg/kg vs. Control                      | **                  | 0.0083             |
|                         | pNRF2          | PA 2 mg/kg vs. Control                      | *                   | 0.0436             |
|                         |                | PA 5 mg/kg vs. Control                      | **                  | 0.0062             |
| <b>Appendix Fig S4B</b> | NRF2           | <i>NFE2L2</i> siRNA vs. Control             | **                  | 0.0055             |
|                         |                | Non-targeting siRNA vs. <i>NFE2L2</i> siRNA | **                  | 0.0048             |

<sup>a</sup>For Newman-Keuls multiple comparison test, the statistics program (Graphpad Prism 7.02) does not output exact *P*-values, only ranges.

## References

Bouman L, Schlierf A, Lutz AK, Shan J, Deinlein A, Kast J, Galehdar Z, Palmisano V, Patenge N, Berg D et al (2011) Parkin is transcriptionally regulated by ATF4: evidence for an interconnection between mitochondrial stress and ER stress. *Cell death and differentiation* 18: 769-782

Kuhn PH, Wang H, Dislich B, Colombo A, Zeitschel U, Ellwart JW, Kremmer E, Rossner S, Lichtenthaler SF (2010) ADAM10 is the physiologically relevant, constitutive alpha-secretase of the amyloid precursor protein in primary neurons. *The EMBO journal* 29: 3020-3032

Stockwell SR, Platt G, Barrie SE, Zoumpoulidou G, Te Poele RH, Aherne GW, Wilson SC, Sheldrake P, McDonald E, Venet M et al (2012) Mechanism-based screen for G1/S checkpoint activators identifies a selective activator of EIF2AK3/PERK signalling. *PloS one* 7: e28568
