# Supplementary material for: PERK activation mitigates tau pathology in vitro and in vivo
Source: PubMed Central journal article supplement (PMC5331260; doi:10.15252/emmm.201606664), 2017-02-01
Supplement: EMMM-9-371-s003.pdf [file EMMM-9-371-s003.pdf]

# Figure 4 G

## Anti-p-Ser-202 tau (CP13)

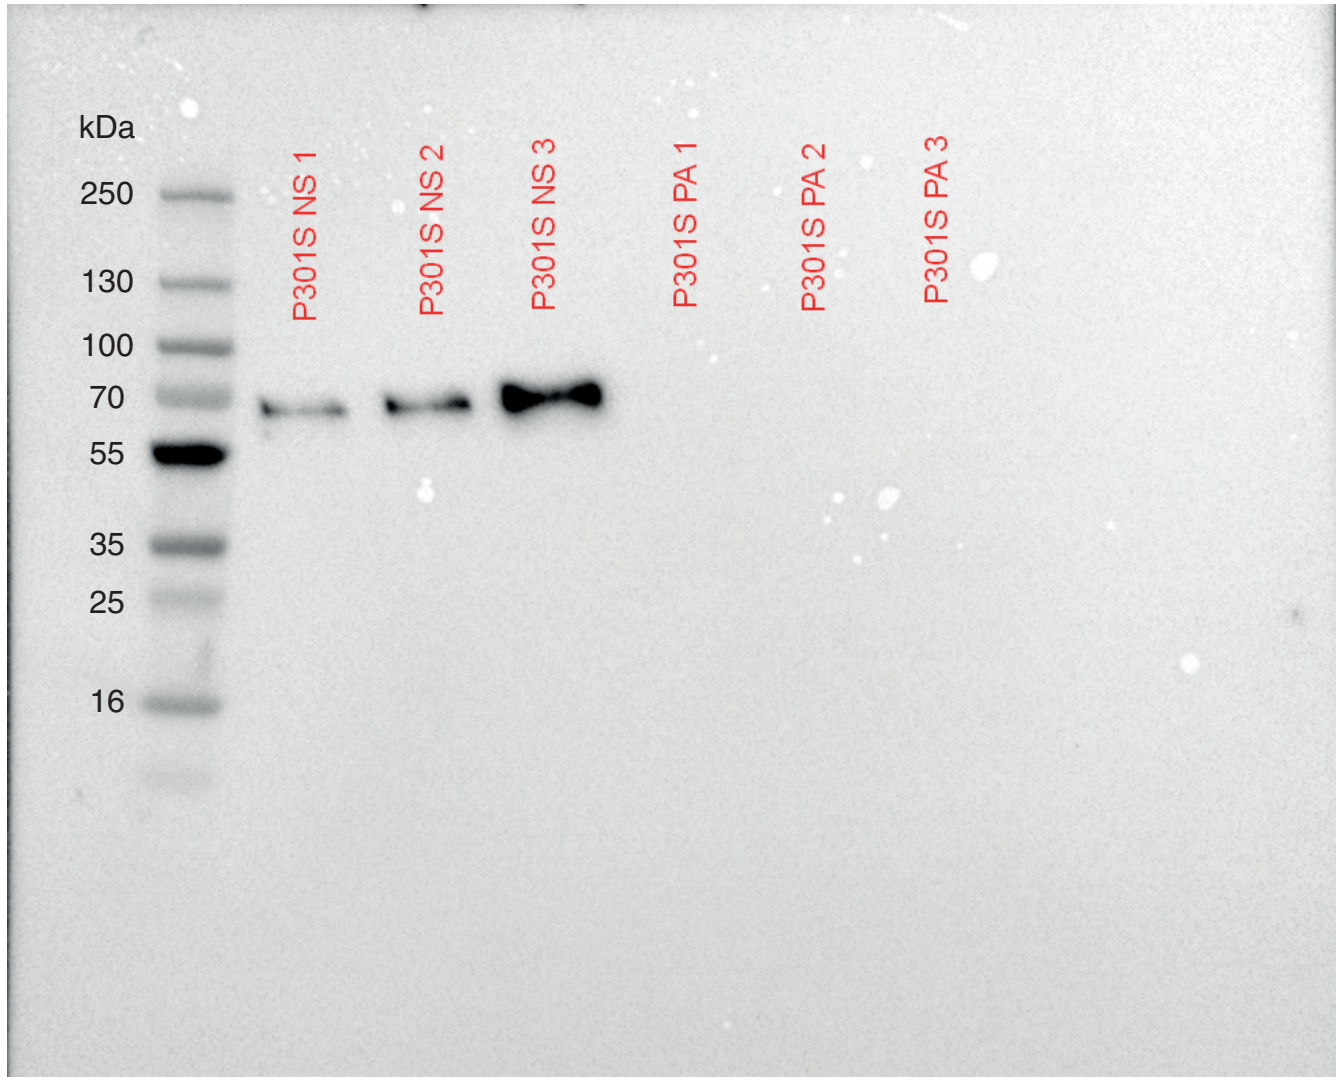

P301S NS= P301S mouse treated with normal saline

P301S PA= P301S mouse treated with PERK activator

# Figure 4 G

Anti-p-Thr-231 tau (AT180)

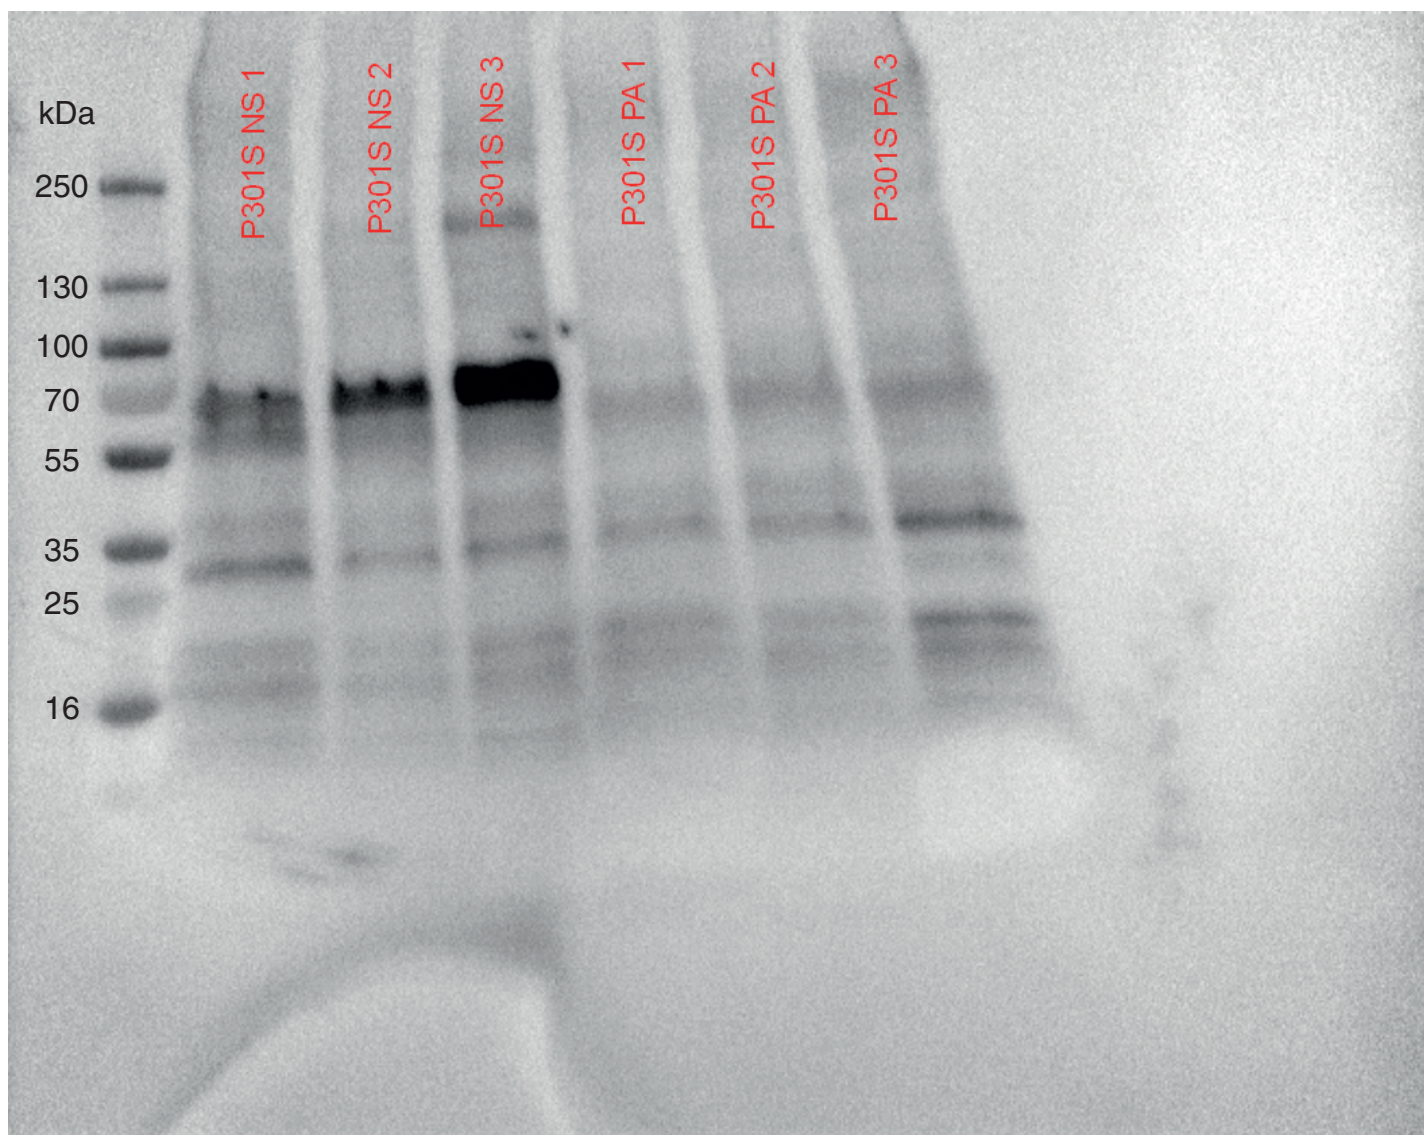

P301S NS= P301S mouse treated with normal saline

P301S PA= P301S mouse treated with PERK activator
